# Supplementary material for: IL-37 expression reduces acute and chronic neuroinflammation and rescues cognitive impairment in an Alzheimer’s disease mouse model
Source: eLife. 2022 Aug 30;11:e75889. doi: 10.7554/eLife.75889 (PMC9481244; doi:10.7554/eLife.75889)
Supplement: Figure 1—figure supplement 1—source data 1. [file elife-75889-fig1-figsupp1-data1.xlsx]

## Sheet: Fig 1 fig sup 1-source data 1
	WT										IL37tg
NIL	0	0	0	0	0	24.587	25.397				0	0	0	0	0	0	18.963	22.148
LPS	749.932	728.036	768.461	751.788	806.085	1549.68	1434.62	1547.62	1816.22		1148.38	1307.16	1350.49	1380.13	1381.43	1318.8	2149.5	1965.75	1991.63	2281.73

## Sheet: Fig 1 fig sup 1-source data 2
	WT										IL37tg
NIL	0	0	0	0	0						0	0	0	0	0	0
LPS	988.385	1004.78	1088.31	1010.75	1160.54						1499.2	1594.49	1974.78	1832.77	1720.55	1826.68
