# Supplementary material for: IL-37 expression reduces acute and chronic neuroinflammation and rescues cognitive impairment in an Alzheimer’s disease mouse model
Source: eLife. 2022 Aug 30;11:e75889. doi: 10.7554/eLife.75889 (PMC9481244; doi:10.7554/eLife.75889)
Supplement: Figure 1—source data 1. [file elife-75889-fig1-data1.xlsx]

## Sheet: Figure 1-source data 1
WT NIL	HET NIL	HOM NIL	WT 100ng 6h	HET 100ng 6h	HOM 100ng 6h	WT 100ng 24h	HET 100ng 24h	HOM 100ng 24h
48.4729	22.676	4.83583	397.582	268.643	18.5007	878.134	775.381	575.722
40.4254	34.443	5.21541	233.566	342.281	63.6705	1508.14	461.469	288.761
12.4507	29.5084	61.0135	123.966	50.0057	31.4063	1231.84	766.65	726.794
18.5821	4.83583	4.07667	93.6923	34.0634	23.0556	1508.14	449.702	303.185
63.0351	1.41962	15.8436				580.375		183.238
27.0128	19.2598	0
30.0786	0	0
6.31922	0	0
0.954206	0	0
	0	0
WT NIL	HET NIL	HOM NIL	WT 1µg 6h	HET 1µg 6h	HOM 1µg 6h	WT 1µg 24h	HET 1µg 24h	HOM 1µg 24h
48.4729	22.676	4.83583	425.557	81.1311	18.8802	1508.14	1209.24	774.242
40.4254	34.443	5.21541	396.432	116.432	17.7415	1250.62	1110.17	929.489
12.4507	29.5084	61.0135	469.243	72.4008	6.35415	731.362	946.191	567.371
18.5821	4.83583	4.07667	251.577	48.4874		1094.65	967.068	863.443
63.0351	1.41962	15.8436	123.2			1508.14	809.163
27.0128	19.2598	0
30.0786	0	0
6.31922	0	0
0.954206	0	0
	0	0

## Sheet: Figure 1-source data 2
NIL WT	WT 1µg ATP	WT 100ng ATP	WT 10ng ATP	NIL IL37	IL37 1µg ATP	IL37 100ng ATP	IL37 10ng ATP
307.616	1248	660.243	330.484	0	1052.25	444.736	224.363
0	1504.55	697.064	309.839	0	1008.55	460.561	233.196
0	1799.45	672.893	234.192	0	1262.08	510.572	216.412
0	1288.81	493.827	184.808	0	1094.9	474.285	158.654
0	1345.68	519.687	189.526	0	1017.88	399.547	178.844
0	1223.38	768.13	155.735	0	974.857	425.313	208.468
	1819.93	1194.29	435.079		985.364	590.59	269.301
	1773.25	1035.45	511.054		980.559	529.49	305.078
	1920.34	960.648	463.806		1003.62	522.873	284.916

## Sheet: Figure 1-source data 3
NIL WT	WT 1µg ATP	WT 100ng ATP	WT 10ng ATP	NIL IL37	IL37 1µg ATP	IL37 100ng ATP	IL37 10ng ATP
0	2745.76	2365.91	758.533	0	2109.32	1558.93	525.165
0	2875.31	2108.06	770.052	0	2220	1602.34	479.714
0	2845.12	2423.76	639.572	0	1510.33	1739.68	444.766
0	3175.92	3061.46	588.308	0	2635.07	2357.1	495.869
0	2977.19	2970.9	522.001	0	2494.2	2294.21	531.186
0	2952.04	2555.83	395.343	0	2632.56	2281.63	557.524
	2920.66	2902.22	1383.37		1745.83	1424.81	607.078
	2983.35	2771.92	1487.04		1818.8	1401.31	614.78
	3102.59	2657.6	1346.2		1890.39	1485.8	629.354

## Sheet: Figure 1-source data 4
NIL WT	1µg ATP	100ng ATP	10ng ATP	NIL IL37	1µg ATP	100ng ATP	10ng ATP
6.798	3994.06	2904.12	1240.21	1.659	2935.43	1642.9	837.819
9.349	4223.8	2498.24	1269.09	2.235	2967.06	1829.22	899.288
4.238	4143.53	2578.49	1124.6	2.952	1209.51	1777.77	806.204
17.66	4304.07	3621.23	1273.28	14.293	3651.15	2098.34	892.165
17.333	3969.15	3305.55	1303.81	13.515	3089.7	2070.98	949.154
17.088	4245.94	2632.26	1075.78	13.36	3098.2	1959	1010.71
	4825.03	3977.01	2455.61		2607.86	1478.86	817.619
	5182.23	3412.94	2649.68		2674.16	1432.2	877.207
	4943.14	4045.85	2441.48		2544.12	1584.61	1035.7

## Sheet: Figure 1-source data 5
0	5	10	20	40	1	4	24
2.1	3.9	4	2.7	3.5	11.9	14.9	3.5
0	0	2.2718	6.77641	9.87738	5.49275	5.49275	14.0366
1		2.95	0	1.56	9.35	9.35	7.73

## Sheet: Figure 1-source data 6
WT 24h	IL37 24h
1209.69	648.932
1250.04	611.013
1308.63	624.997

## Sheet: Figure 1-source data 7
NIL	100ng LPS	100ng rIL37b 100ng LPS	500ng rIL37b 100ng LPS	1µg LPS	100ng rIL37b 1µg LPS	500ng rIL37b 1µg LPS
0	1001.65	981.05	333.569	1573.32	1160.14	689.478
0	1064.39	824.206	307.583	1551.79	1515.71	556.443
0	825.249	710.168	328.392	1358.39	1489.17	689.833
0	423.528	311.473	339.955	579.337	618.899	937.164
0	366.149	350.87	406.404	651.746	605.931	899.126
0	334.458	276.453	419.993	767.923	533.641	962.193
0	469.038	344.638		1011.73	686.119
0	433.74	299.531		998.483	825.062
0	375.807	418.079		995.889	1055.72
	868.288			1448.1
	789.439			1157.09
	794.703			1440.45
	668.997			1059.2
	686.996			1030.17
	638.954			984.752
	772.276			1614.45
	652.684			1237.45
	840.003			1277.82
