# Supplementary material for: IL-37 expression reduces acute and chronic neuroinflammation and rescues cognitive impairment in an Alzheimer’s disease mouse model
Source: eLife. 2022 Aug 30;11:e75889. doi: 10.7554/eLife.75889 (PMC9481244; doi:10.7554/eLife.75889)
Supplement: Figure 2—source data 1. [file elife-75889-fig2-data1.xlsx]

## Sheet: Figure 2-source data 1
WT																IL-37tg
0.0944097	0.0637802		0.0505907	0.0472434	0.0527936			0.0110622	0.0190774	0.041418			0.0221288	0.0249442	0.0208498	0.0379854	0.0520968		0.0273621	0.0282694	0.0280722			0.0196382	0.014554	0.0222188	0.0243871		0.00582083	0.00789104
2.66432	2.76282		2.76138	3.06062	2.95122			2.07372	2.18157	1.58264			1.1586	1.59425	1.21536	1.15322	1.39276		1.15713	1.16915	1.14656			0.941766	0.683249	0.901125	0.971185		0.407797	0.292847

## Sheet: Figure 2-source data 2
	WT																IL-37tg
NaCl	0.068523	0.0469315		0.0224751	0.0225099	0.0253952			0.0211889	0.0455195	0.026795			0.022604	0.060979	0.0597806	0.0752349	0.0748576		0.0372747	0.0379589	0.0328398			0.0478594	0.0258141	0.0317675	0.0351386		0.0413576	0.102507
LPS	0.255966	0.304434		0.322982	0.369804	0.357737			0.32383	0.335592	0.286834			0.139746	0.170364	0.15522	0.128848	0.174921		0.192746	0.194005	0.180168			0.151249	0.148702	0.236184	0.171539		0.105551	0.052247
