# Supplementary material for: IL-37 expression reduces acute and chronic neuroinflammation and rescues cognitive impairment in an Alzheimer’s disease mouse model
Source: eLife. 2022 Aug 30;11:e75889. doi: 10.7554/eLife.75889 (PMC9481244; doi:10.7554/eLife.75889)
Supplement: Figure 3—figure supplement 1—source data 1. [file elife-75889-fig3-figsupp1-data1.xlsx]

## Sheet: Fig 3 fig sup 1-source data 1
	WT										IL37tg
NaCl	6.45672	5.99613	4.92751	4.10576	11.115	9.17106	9.1929	7.72872			4.82054	7.18319	4.14225	4.08066	10.1839	12.1297	10.2787
LPS	4.18839	12.1436	6.86839	3.07515	5.94452	5.03169	45.9574	38.7318	55.4042	15.1542	4.46993	8.97848	4.09249	5.10744	4.46911	12.0862	22.6144	36.4176

## Sheet: Fig 3 fig sup 1-source data 2
	WT										IL37tg
NaCl	4.61883	2.40644	6.84526								3.00166	2.31543	10.8505
LPS	1.57569	5.02814	4.75778	7.97902	11.2747						2.41483	4.00517	4.06034	8.61012	11.8603
