# Supplementary material for: IL-37 expression reduces acute and chronic neuroinflammation and rescues cognitive impairment in an Alzheimer’s disease mouse model
Source: eLife. 2022 Aug 30;11:e75889. doi: 10.7554/eLife.75889 (PMC9481244; doi:10.7554/eLife.75889)
Supplement: Figure 3—source data 1. [file elife-75889-fig3-data1.xlsx]

## Sheet: Figure 3-source data 1
	WT																						IL-37tg
NaCl	100	100	99	98	100	100	100	103	103	100													100	99	98	99	100	99	100	105	98	100
LPS	89	90	90	91		91	92	91	93	93	93	91	90	93	93	93	91	87	90	90	91		94	92	94	91	88	91	99	98	89	94	97	91	95	91	91	90	91	92	98	99	89	99

## Sheet: Figure 3-source data 2
	WT					IL-37tg
NaCl	17.6	18.9	18.8	16.2		12.3	15.6	11.4	10.6
LPS	23.9	28.4	28.7	25.3		10.9	13.4	17	9.18

## Sheet: Figure 3-source data 3
	WT										IL37tg
NaCl	18.1407	22.305	6.91603	6.24548	33.8503	63.1205	37.8479				20.5891	21.0824	6.86205	8.5981	41.6937	41.878
LPS	44.0668	222.895	120.505				103.256	59.7062	40.5401		20.4657		8.06517	9.97233	8.28175	86.4572	88.4185	70.4384	61.6307

## Sheet: Figure 3-source data 4
	WT																				IL-37tg
NaCl	22926.3	21719.7	20651.5	18942.4	19329	16751.8	21798.8	23479	22832.4		11049.7	13120.3	18474	15141	16912.9	12462.1	17194.8	13530.3	18604.2	11162.5	18886	16777.6	17718.2	16378.8	12300.3	15785.3	17073.9	17288.7	22550.5
LPS	17718.2	24692.8	21833	26416.3	19957.2	21363.6	27382.7	22325	25127.7		17835.4	14185	22550.5	23302.2	20295.4	21197.5	21007.6	19167.9	18213.9		11685.2	12942	13530.3	18942.4	19957.2	14883.3	24805.5	20589.6	19973.3		18530.6	14118.6	15221.6	21503.5	16067.2	19329	15375.3	15221.6

## Sheet: Figure 3-source data 5
	WT																				IL-37tg
NaCl	22174.7	23877	19543.8	19919.6	16751.8	17835.4	25070.8	20295.4	25707.6		14031.4	17814.9	20796.6	19987.9	19167.9	13154.5	15611.9	13852.4	20589.6	17589.4	20589.6	14094.1	16236.4	17194.8	15001	20633.7	19329	19939.4	20633.7
LPS	23001.5	22663.2	25031	28128.8	24119.2	29766.7	25449.8	18265.9	19651.1		24483.4	16236.4	33825.7	31689.4	28413.6	26609.6	23302.2	20295.4	24644.5		18040.4	12120.9	13530.3	21648.5	18942.4	20617.6	22550.5	18450.4	18530.6		25772	22872.6	21297.7	26790	22099.5	25772	20506.8	21377.9

## Sheet: Figure 3-source data 6
	WT																														IL-37tg
NaCl	8	8	9	9	5	5	8	10	8	6	7	6	9	9	8	7	7	11	10	10	10	13	9	10	12	11	8	11	9	11	6	7	14	7	10	6	9	6	6	8	7	8	11	10	7	8	8	9
LPS	8	13	6	9	10	5	12	8	9	13	11	9	8	6	10	11	9	12	5	8	9	9	8	7	9	11	9	8	10	8	7	8	10	9	8	7	9	7	12	8	9	9	11	9	6	13	7	6	7
[truncated: 11 more columns]

## Sheet: Figure 3-source data 7
	WT																														IL-37tg
NaCl	6	8	7	8	8	8	8	8	8	9	7	7	7	9	8	8	9	8	8	8	11	11	8	7	8	8	9	8	10	10	6	6	9	9	9	6	8	8	9	10	8	7	7	9	9	9	7	10
LPS	7	9	9	9	10	9	7	11	8	12	11	10	8	8	7	9	9	5	8	8	11	7	8	11	10	10	13	7	10	8	9	10	10	9	8	8	16	9	9	7	7	9	9	6	10	10	9	8	7
[truncated: 11 more columns]
