# Supplementary material for: IL-37 expression reduces acute and chronic neuroinflammation and rescues cognitive impairment in an Alzheimer’s disease mouse model
Source: eLife. 2022 Aug 30;11:e75889. doi: 10.7554/eLife.75889 (PMC9481244; doi:10.7554/eLife.75889)
Supplement: Figure 4—source data 1. [file elife-75889-fig4-data1.xlsx]

## Sheet: Figure 4-source data 1
	Saline (n=13)																	LPS (n=17)
0	100	100	100	100	100	100	100	100	100	100	100	100	100					100	100	100	100	100	100	100	100	100	100	100	100	100	100	100	100	100
1	99.0232	117.243	104.478	97.6543	106.004	104.779	103.763	108.125	116.213	96.2153	96.9153	105.257	103.271					125.108	118.736	101.543	134.252	92.9522	101.012	97.1464	108.792	97.7912	100.969	112.82	106.607	109.182	103.386	102.492	98.2913	100.531
4	102.235	76.0836	99.5025	100.07	103.41	106.135	103.644	103.942	107.075	100.336	105.887	102.343	94.6343					103.3	115.611	104.171	103.753	92.7614	103.742	101.894	105.72	89.5974	94.2469	106.023	108.761	104.195	105.182	102.326	97.3676	98.4659
7	100.763	84.5027	102.121	99.7685	96.1824	105.844	99.1115	101.956	101.744	97.2246	109.32	103.975	96.5638					93.3525	104.555	93.242	106.678	94.7655	97.7999	100.565	99.2139	108.657	106.461	101.133	104.3	101.1	104.926	100.831	105.911	99.7197
10	95.6778	113.19	107.751	97.3523	95.0704	98.194	95.1756	94.6356	102.658	103.953	98.909	101.644	94.3587					94.6915	93.0177	114.547	87.8769	97.2467	100.369	102.464	100.027	103.135	100.896	99.7018	97.531	102.132	95.177	101.384	98.6761	99.2772
13	100.495	105.083	101.597	100.272	98.2209	97.4193	101.974	92.2305	97.9362	100	104.668	96.981	95.8287					105.787	93.0177	106.938	99.7145	94.67	103.581	97.5262	100.208	99.3053	102.414	97.4359	93.6851	94.5667	99.923	101.107	101.986	103.113
16	100.763	108.513	93.6109	101.077	101.742	96.354	100.9	96.8315	90.3206	96.8881	95.1432	94.1835	106.579					104.065	90.1334	110.12	94.5617	103.545	97.4787	97.6212	95.961	107.588	95.0419	95.4085	95.685	94.2228	96.588	98.6711	100.6	100.679
19	94.6072	120.362	93.349	100.171	105.819	91.5121	102.689	97.9818	89.8637	98.9066	92.9279	98.6129	103.73					93.7351	87.9702	96.1472	102.082	103.164	102.618	99.6154	97.0453	105.005	94.1023	91.9499	96.3003	102.304	98.7686	94.1307	106.681	98.3921
22	139.034	276.894	157.633	173.462	208.302	220.21	210.985	197.846	264.413	218.251	202.913	177.41	217.291					275.275	156.952	231.722	157.788	204.609	203.469	188.69	116.743	185.34	183.145	167.442	191.831	240.715	195.87	144.02	194.042	156.881
25	138.499	255.379	200.969	180.409	202.001	264.853	190.59	208.407	264.413	213.12	220.413	171.815	227.03					306.839	143.492	261.188	128.403	214.916	205.878	187.266	128.309	210.1	186.253	164.46	205.215	236.761	210.621	147.674	202.432	166.544
28	123.645	246.648	200.445	172.556	193.106	262.335	202.636	195.755	252.38	215.307	201.473	166.686	221.61					296.509	161.519	232.137	101.664	213.676	201.06	183.182	129.574	199.59	138.479	147.287	198.446	241.059	211.391	144.795	200.739	168.24
31	133.414	270.97	191.935	169.939	198.666	253.329	212.416	196.8	242.632	216.653	182.422	164.005	212.514					240.459	149.501	231.583	105.703	208.045	197.688	174.351	122.617	207.784	178.231	137.507	189.216	238.136	204.849	140.365	202.894	171.117
34	132.076	271.593	183.949	159.871	191.067	243.839	196.315	193.036	229.685	215.223	192.723	161.674	211.227					200.287	147.338	235.042	81.1921	201.937	194.476	169.033	121.352	201.372	181.989	121.407	186.139	225.929	208.184	138.538	198.045	171.633
37	134.083	250.702	185.52	156.549	178.28	242.87	196.553	188.226	226.639	215.307	186.742	157.944	217.751					206.408	166.086	217.058	81.6099	204.705	191.746	165.519	122.888	191.664	181.266	109.362	171.218	228.164	200.231	140.255	192.811	170.527
40	137.16	250.39	177.664	155.945	174.018	239.965	193.452	185.716	220.851	211.943	174.226	159.459	213.8					190.722	153.587	199.212	87.1806	190.008	181.789	167.988	119.996	181.867	174.762	104.472	171.064	225.585	202.796	137.708	188.732	169.346
43	144.52	250.39	181.723	151.918	181.801	230.281	193.81	183.415	211.408	210.429	171.125	157.711	211.963					132.568	146.857	190.773	92.1941	190.294	185.322	169.128	113.219	193.445	178.52	119.857	168.295	229.023	198.05	136.434	196.66	168.461
46	145.858	253.196	176.748	146.179	182.913	223.793	208.838	180.069	205.011	207.654	180.539	153.631	208.839					133.142	153.587	210.417	90.8015	193.348	179.862	152.225	110.418	203.509	183.94	105.546	150.296	220.426	196.511	135.825	196.89	163.298
49	136.759	293.109	171.511	144.367	179.763	217.789	214.443	176.2	199.985	208.494	180.096	153.981	206.634					144.046	148.54	210.555	81.0529	190.962	180.344	157.827	110.057	193.89	180.688	100.179	154.142	214.237	201.385	127.132	198.661	164.847
52	138.365	276.271	169.547	145.273	168.643	215.659	193.333	181.219	189.78	212.531	177.438	153.398	200.386					131.229	159.356	205.298	72.5576	190.008	173.759	160.581	104.364	208.229	184.085	100.537	142.143	210.798	202.54	127.298	196.89	159.315
55	143.182	281.26	174.653	140.24	166.79	208.977	205.856	181.742	197.243	216.064	170.349	157.011	204.704					105.978	143.252	183.025	77.2927	183.519	177.453	159.157	95.5995	187.567	185.025	93.9773	134.297	213.893	203.181	116.999	199.43	162.266
58	145.457	279.077	173.213	141.347	178.651	194.161	211.581	178.814	195.111	215.391	165.808	153.864	207.644					100.622	139.647	208.342	80.4958	191.44	183.074	168.083	90.4491	177.859	182.134	96.7203	128.913	206.843	198.82	110.687	196.89	155.038
61	137.829	280.324	180.283	154.133	177.724	199.099	219.691	177.455	196.025	211.102	174.78	147.919	206.358					109.039	138.445	196.03	82.167	167.581	171.672	170.362	85.9312	195.404	185.603	79.4275	119.991	202.545	199.076	103.267	201.201	150.243
64	134.618	299.969	178.581	150.106	165.493	199.003	208.003	174.318	184.297	217.073	160.713	143.723	204.429					110.569	156.712	177.63	88.2947	177.506	179.22	169.982	85.5697	178.304	190.445	82.5283	123.837	212.345	204.72	99.2802	201.432	148.178
67	146.929	279.077	183.032	149.502	164.937	201.036	210.507	173.272	183.231	224.222	163.593	145.588	197.997					99.2826	147.098	189.528	67.2655	177.22	192.709	171.407	79.0639	175.454	186.398	77.9964	122.144	218.707	198.307	93.9092	199.738	151.497
70	153.62	284.69	178.712	150.408	171.794	195.226	221.122	174.527	187.038	218.671	168.356	147.919	195.608					98.7087	137.003	191.603	81.3314	168.058	193.03	175.49	74.3652	163.253	192.541	99.3441	116.453	211.829	196.383	88.7043	198.738	151.129
73	153.754	291.238	184.734	151.213	179.763	191.643	216.113	177.036	177.29	215.643	175.001	149.085	191.933					89.9091	119.697	187.868	77.8497	168.726	188.052	174.351	74.9977	171.803	186.615	90.161	122.76	201.857	195.485	90.6423	202.201	149.58
76	144.788	291.862	179.628	148.797	179.392	195.42	213.847	176.095	161.602	216.316	166.251	147.22	192.852					96.4132	118.976	172.65	81.7492	169.585	192.549	171.502	73.1906	180.442	186.253	95.17	119.222	210.282	195.357	84.6069	204.357	149.58
80	156.43	289.055	174.653	149.602	178.836	208.493	225.893	169.403	169.979	227.082	156.837	145.471	189.912					103.682	111.285	197.69	74.3681	171.589	191.585	173.876	66.1426	183.559	192.469	94.3351	117.991	208.391	207.029	76.7996	198.738	151.866

## Sheet: Figure 4-source data 2
	Saline (n=11)																	LPS (n=14)
0	100	100	100	100	100	100	100	100	100	100	100							100	100	100	100	100	100	100	100	100	100	100	100	100	100
1	97.1787	94.5575	115.398	113.38	139.766	110.266	97.9989	107.446	110.536	94.7328	102.999							101.485	92.7013	93.3202	101.066	103.146	84.5612	108.183	117.346	103.236	119.118	106.963	108.885	94.3916	119.963
4	101.475	105.24	99.5562	102.85	133.336	106.352	96.4092	91.4331	108.517	99.4366	94.9628							97.4867	105.495	117.551	101.772	110.244	102.925	102.774	113.546	102.107	115.545	117.418	108.3	94.5431	115.503
7	97.9914	117.222	90.5429	98.6774	124.876	102.214	99.495	92.0737	96.791	97.1394	101.921							106.626	104.866	95.2849	100.501	91.3177	109.118	98.2452	104.621	96.8389	97.6772	108.073	102.062	94.6946	104.122
10	104.493	78.3889	101.741	98.4848	132.152	100.872	98.3729	98.9592	134.95	92.6544	101.333							99.5811	104.656	95.9398	99.0896	96.9955	113.175	99.1257	105.328	99.5986	89.3389	104.465	98.9423	101.917	94.4325
13	99.2686	84.0191	100.512	101.181	121.83	96.0635	96.7832	100.56	118.129	103.265	100.255							97.8675	92.2819	102.652	99.2307	102.2	103.78	100.006	102.059	95.8354	81.0006	93.8237	95.823	103.23	91.3565
16	104.261	101.343	103.653	96.0452	123.861	95.6162	105.48	110.809	107.172	107.203	105.743							97.2963	95.6376	105.108	98.6661	105.039	96.3058	99.1257	89.423	98.4696	86.9565	94.564	94.6532	101.614	94.4325
19	95.9015	114.046	87.675	96.2378	121.83	93.6032	109.501	101.681	102.942	108.407	100.745							95.773	110.319	93.3202	102.336	97.9418	90.7538	101.138	90.395	92.9503	95.2948	76.0583	93.8734	106.26	86.1274
22	162.197	166.739	155.685	192.732	186.637	194.14	234.15	201.441	174.07	172.291	204.724							217.06	182.257	248.035	146.658	230.897	221.012	199.006	251.48	205.595	240.619	239.463	195.058	163.481	214.857
25	172.646	177.133	170.161	197.355	191.544	221.203	240.135	216.173	177.53	186.403	207.958							222.772	214.555	232.318	145.388	232.316	219.731	197.748	242.114	190.291	222.752	234.837	192.036	161.915	233.62
28	192.964	177.277	163.605	196.97	191.544	218.519	238.545	199.84	166.957	184.652	206.39							234.577	202.81	222.822	183.64	220.014	232.543	190.955	244.323	176.242	216.796	223.363	184.432	189.086	230.391
31	187.623	191.714	161.557	185.478	177.331	217.96	235.553	190.552	157.634	176.667	200.412							240.861	211.619	205.959	179.829	217.649	213.752	190.704	229.92	169.97	212.031	205.69	176.536	182.571	221.932
34	198.073	182.186	165.79	176.618	182.915	202.975	225.734	184.788	163.497	172.291	204.626							230.388	208.263	191.88	182.37	200.142	201.367	196.868	224.088	163.572	181.06	196.438	164.059	183.935	214.396
37	194.59	172.658	161.966	170.198	173.608	200.179	225.267	178.863	170.321	177.98	200.902							222.201	205.956	183.202	176.441	190.679	191.33	199.887	218.079	167.461	220.369	192.274	148.852	185.551	211.32
40	183.56	162.697	154.319	168.208	168.532	193.357	228.259	173.579	195.408	187.168	200.216							225.248	195.05	171.251	159.08	186.421	187.7	193.22	198.904	162.193	209.649	192.644	145.928	183.682	201.323
43	188.9	168.904	151.041	168.464	158.041	188.437	221.713	153.083	195.985	181.589	201.392							205.446	195.47	169.45	170.09	191.625	174.888	191.584	212.777	153.537	212.031	182.466	151.777	184.49	197.478
46	196.215	152.447	147.627	161.081	158.548	186.871	220.965	152.602	179.837	169.338	199.53							200.495	194.002	159.954	164.726	174.119	158.659	192.968	195.812	165.078	185.825	177.932	174.294	188.43	192.864
49	191.919	169.337	152.68	154.404	141.966	182.845	220.217	162.85	165.419	179.073	203.646							207.54	198.196	164.538	171.784	170.807	150.544	191.333	174.781	170.346	202.501	178.024	164.449	165.753	189.173
52	197.26	180.598	146.944	152.928	147.55	177.813	219.188	153.083	170.994	187.497	200.02							202.589	195.47	165.357	157.386	168.441	147.768	186.427	159.671	172.102	175.104	171.733	164.449	194.339	186.558
55	202.833	175.112	144.35	154.212	153.98	176.471	216.851	153.083	175.031	188.919	202.078							197.068	187.29	154.06	150.611	168.441	151.399	187.559	155.872	174.36	182.251	171.363	149.242	182.571	177.023
58	228.956	183.196	148.583	148.305	163.117	174.346	201.982	111.449	163.881	179.73	203.842							202.589	183.096	153.897	155.127	143.364	135.81	182.779	155.872	175.489	189.399	166.643	148.755	192.167	171.024
61	231.394	162.552	148.72	143.747	146.027	174.458	203.572	144.115	166.957	176.448	205.704							205.446	183.096	143.746	147.787	137.686	139.654	179.508	155.783	167.963	189.399	165.256	161.525	190.45	172.101
64	216.881	164.862	143.53	144.26	145.689	174.681	197.868	138.03	163.593	187.059	207.174							204.684	196.309	143.91	166.843	135.321	141.79	138.248	130.865	163.071	189.399	163.22	141.444	184.238	171.024
67	221.526	159.954	140.662	145.994	156.687	168.307	189.826	129.864	165.996	181.261	211.486							203.732	194.421	143.091	157.527	133.428	142.216	142.776	155.783	168.088	190.59	171.64	154.506	184.238	156.875
70	246.024	175.401	145.442	142.078	152.795	170.879	183	130.184	160.902	178.964	197.57							203.922	183.725	130.157	154.422	124.911	140.935	146.676	162.411	164.325	212.031	162.665	147.585	184.642	166.718
73	240.451	169.482	141.755	145.673	147.888	172.333	180.381	120.576	150.329	173.713	197.962							201.066	179.111	113.785	154.563	118.76	132.821	182.779	138.199	165.579	165.575	168.216	142.126	181.056	174.254
76	204.11	167.894	139.433	141.628	151.611	168.083	177.763	123.779	146.388	183.23	197.08							196.687	184.564	121.153	161.762	114.975	128.55	179.508	134.753	168.59	154.854	155.355	144.563	175.501	175.484
80	227.563	165.295	141.618	133.603	148.058	168.195	176.174	134.347	146.965	183.449	197.178							177.647	196.099	114.604	151.881	151.408	126.201	182.779	130.6	163.071	187.016	149.988	144.953	174.188	158.874

## Sheet: Figure 4-source data 3
	WT																		IL-37tg
NaCl	79.6711	156.85	95.9977	80.0454	93.1017	110.534	118.29	92.051	90.227	118.025	85.2315	77.9455	102.03						127.905	103.781	85.091	84.8241	89.8172	102.657	107.638	78.2936	87.6342	112.34	120.019
LPS	56.9778	63.2043	97.6309	40.5714	92.8741	102.471	90.8097	37.4545	92.5748	101	50.1366	63.3212	114.129	108.082	43.9065	108.385	80.6124		113.361	117.803	72.6961	96.736	79.0585	79.909	111.804	78.2121	101.246	108.314	91.5212	86.0919	107.157	99.1327

## Sheet: Figure 4-source data 4
	WT																									IL-37tg
NaCl	1.3936	1.49985	1.21467	1.2995	1.4032	1.30934	1.3638	1.10238	1.28122	1.14855	1.05033	1.2354	1.81714	1.37904	1.09878	1.16131	1.25272	1.41516								1.4448	1.68477	1.57286	1.60699	1.4338	1.38545	1.35681	1.26443	1.40298	1.43695	1.47796	1.36903	1.2752	1.241	1.43107	1.24883
LPS	0.99614	0.819465	0.97995	1.23595	0.988794	0.856117	1.00384	0.90071	1.3759	1.12888	0.838662	1.13184	1.27338	1.35099	1.28675	1.05798	1.18206	0.810845	1.17454	0.96231	0.928074	1.33899	1.12843	1.06157	1.02255	1.32941	1.32684	1.26074	1.37199	1.23411	1.29442	1.41103	1.25621	1.38889	1.29084	1.30973	1.39079	1.26134	1.40929	1.15029	1.5894	1.28299	1.07954	1.40523	1.20701	1.38

## Sheet: Figure 4-source data 5
	WT																									IL-37tg
NaCl	1.56532	1.18486	1.27211	1.11597	1.49895	1.07784	1.19689	1.1159	1.11583	1.41457	1.40172	1.48242	1.09864	1.7053	1.04334											1.42531	1.02141	1.01584	1.28003	1.22605	1.24844	1.05879	1.03788	1.24406	1.34807	1.17476	1.05008	1.15231
LPS	1.5259	0.79719	1.42143	1.37132	1.10443	1.58655	1.09386	0.756079	0.688419	0.920137	1.30645	0.87576	1.01795	0.857741	0.863206	1.08757	0.9684	0.766528	0.763359							1.66133	1.13025	0.929504	1.0409	1.50746	1.20074	0.757257	1.34709	1.17884	1.06882	1.02588	1.2896	1.33147	0.995219	1.69756	1.17986	1.23173	1.43447	1.31421

## Sheet: Figure 4-source data 6
	WT-Control																	WT-LPS
0	1	1	1	1	1	1	1	1	1	1	1	1	1	1	1	1	1	1	1	1	1	1	1	1	1	1	1	1	1	1	1	1
1	0.99629	1.02964	1.00525	0.939516	0.968807	0.906456	1.02508	1.00826	1.00694	1.0475	0.971589	0.943015	1.11201	0.982531	0.944226	1.0143	0.994171	1.12327	1.02824	1.01705	1.04506	1.07062	1.10047	1.12907	0.973963	1.0274	1.07302	0.887643	1.14709	1.00675	1.00252	1.02332
4	1.03021	1.01404	1.0178	0.95937	0.962636	0.935859	1.00154	1.05081	0.965155	0.93125	1.02395	1.02249	1.04233	0.957205	1.051	1.06435	1.00596	1.07638	0.957213	0.974015	1.06691	1.08566	0.909943	1.08628	0.969142	1.03794	0.99588	0.911145	1.0492	0.92958	1.03112	1.00772
7	1.02809	1.00711	1.00525	1.009	0.96387	0.908976	1.03009	0.983015	0.993462	0.94	0.948318	0.995405	1.00575	0.949412	1.01583	0.995311	0.992861	1.03157	1.04854	1.03856	0.990442	0.985848	1.08902	1.02448	1.01736	0.982613	0.932761	1.05577	1.00527	0.992721	1.00421	1.00304
10	1.01537	0.99844	0.978593	0.958661	1.0009	0.961062	0.969136	0.989506	0.993462	0.94875	0.980639	0.944347	0.994716	0.995519	1.1628	1.05687	0.954876	0.979473	1.03839	1.0005	1.04688	0.951665	0.912025	1.00547	1.00771	1.02081	1.02043	1.00877	0.987701	1.00851	1.00589	0.982763
13	0.966614	0.99844	0.977025	1.06006	0.981148	1.04759	1.02392	1.00754	1.09052	0.97125	1.01425	0.935023	0.977295	1.015	0.919102	0.934327	0.970594	0.973221	0.933536	0.97898	0.979518	0.980379	1.05778	0.988828	1.027	0.986565	0.941527	1.016	0.96762	0.975182	0.98402	0.932845
16	0.962374	0.977639	1.03035	1.03028	1.02558	1.06943	1.01582	0.993112	1.0002	1.1025	0.990336	1.0398	0.975553	0.95136	1.04933	0.884849	0.948327	0.958633	1.01471	0.993049	1.04506	1.00636	0.966163	0.912764	0.96432	1.01291	0.96432	1.04131	0.958835	1.02955	1.01262	1.03424
19	0.992051	0.977639	0.978593	1.02744	0.983617	1.15092	1.03202	0.990949	0.959763	0.98875	1.04658	1.04113	0.934905	0.995519	0.897329	1.02178	1.04787	0.911743	0.984272	1.00381	1.03778	0.92842	0.874545	0.934157	1.01254	0.970759	1.02393	1.08289	0.93499	1.03657	1.00252	1.04828
22	2.59036	1.61553	1.95248	1.24513	1.4205	2.02041	1.38889	1.6047	1.78338	2.2925	2.11319	1.79324	2.30416	2.21053	1.87463	1.87268	2.37999	1.48171	1.3428	1.96789	1.71142	1.4439	1.8938	1.58783	2.20829	1.89805	1.08179	2.69186	2.22264	2.10822	1.20437	1.87349
25	2.81293	1.59473	1.80193	1.31674	1.37546	1.98681	1.39776	1.57081	1.70789	2.44375	2.13582	1.89846	2.35643	2.27482	1.88552	1.85715	2.36427	1.43066	1.29883	1.88265	1.70596	1.42886	1.9417	1.56644	2.07329	1.8941	1.194	2.52915	2.2126	2.08191	1.13373	1.84229
28	2.56492	1.52019	1.7094	1.31532	1.43408	1.95573	1.36999	1.60831	1.76316	2.5075	2.02851	1.84829	2.32797	2.13066	1.88636	1.96416	2.21625	1.29728	1.17707	1.80238	1.72235	1.39058	1.72202	1.54267	2.054	1.83219	1.22381	2.20193	2.16867	2.09068	1.08663	1.87661
31	2.5522	1.45606	1.62785	1.30752	1.37299	2.04058	1.326	1.59316	1.60814	2.55	2.06341	1.77592	2.37675	2.143	1.84742	1.83529	2.00013	1.29207	1.16354	1.73949	1.52572	1.36597	1.79594	1.4975	2.04918	1.85195	1.194	2.11154	2.10843	2.03455	1.08999	1.80485
34	2.50556	1.45606	1.58551	1.38197	1.37052	2.01369	1.39853	1.55061	1.42077	2.53375	2.09251	1.77637	2.3332	2.05857	1.85119	1.73288	2.14159	1.29207	1.1906	1.70887	1.56759	1.33315	1.73868	1.50939	1.86114	1.79531	1.2203	2.3104	2.1009	2.02403	1.07149	1.80797
37	2.41229	1.40752	1.55728	1.39261	1.4131	2.02881	1.33295	1.55133	1.75912	2.64625	2.10026	1.65294	2.32274	2.01442	1.88175	1.86002	1.99096	1.27227	1.13648	1.73701	1.49294	1.28393	1.75117	1.46898	1.83221	1.85195	1.32024	2.30317	2.06953	2.01175	1.04626	1.55526
40	2.41653	1.38152	1.5761	1.37347	1.36682	2.08342	1.32832	1.47056	1.47739	2.5575	2.05243	1.72487	2.25481	2.0878	1.88133	1.67707	1.77484	1.20142	1.10604	1.70225	1.5421	1.33862	1.77928	1.44996	1.78399	1.73999	1.23959	1.97053	2.01054	1.9872	1.03617	1.46478
43	2.22788	1.40579	1.58551	1.39332	1.35509	2.05318	1.31906	1.54556	1.74159	2.5925	2.03691	1.6485	2.2519	2.09624	1.87045	1.53727	1.79187	1.21496	1.1128	1.67246	1.43833	1.31811	1.61791	1.46423	1.75024	1.7716	1.30096	1.91449	2.05321	2.02929	1.05971	1.54122
46	2.14944	1.36419	1.57453	1.321	1.38533	2.1061	1.31751	1.5434	1.76046	2.6525	2.04144	1.74973	2.17235	2.20339	1.87505	1.75819	1.83771	1.19933	1.0553	1.67577	1.40191	1.27572	1.73139	1.47849	1.33076	1.72155	1.33777	1.98861	2.04192	2.04508	1.03112	1.6941
49	2.11129	1.33819	1.58394	1.37772	1.37114	2.13299	1.36883	1.472	1.48278	2.71	2.0117	1.82165	2.19151	2.18586	1.87128	1.73805	1.78794	1.19725	1.06545	1.68735	1.40555	1.24427	1.7366	1.42857	1.46094	1.71891	1.28518	1.81144	2.00803	1.95212	1.04458	1.64262
52	2.08161	1.33125	1.58865	1.30611	1.37052	2.10946	1.24537	1.47056	1.32372	2.72375	1.9852	1.65072	2.17583	2.06897	1.8516	1.42335	1.7971	1.11702	1.00118	1.66667	1.41466	1.24427	1.74909	1.42382	1.39826	1.71496	1.36583	1.80783	2.01054	2.03455	1.04794	1.44606
55	2.19396	1.30699	1.56669	1.37063	1.3915	2.13467	1.30903	1.48859	1.7362	2.55	2.0033	1.5677	2.16538	2.05403	1.85286	1.61896	1.61373	1.15557	1.0181	1.67991	1.34911	1.17591	1.67829	1.44759	1.35487	1.7334	1.27992	1.88556	1.99172	2.01175	1.03785	1.41643
58	2.04134	1.29485	1.56355	1.42877	1.39089	2.17667	1.39776	1.48714	1.49222	2.7225	1.97097	1.57835	2.16944	2.5164	1.88301	1.63277	1.72244	1.11076	1.09927	1.71218	1.18889	1.20052	1.5544	1.39767	1.0945	1.71101	1.34303	1.68309	1.97038	1.91353	1.03953	1.25107
61	2.13884	1.29139	1.58708	1.45714	1.35324	2.19263	1.25232	1.52248	1.42212	2.8375	1.98649	1.58679	2.1526	2.37548	1.8604	1.49239	1.72506	1.12744	1.08574	1.71797	1.29995	1.16634	1.78241	1.39767	1.13308	1.75316	1.39213	1.52581	1.97917	1.96615	1.05467	1.28383
64	2.09433	1.29139	1.56512	1.34369	1.38286	2.24388	1.30787	1.4619	1.36011	2.87	1.94641	1.54994	2.21822	2.36249	1.79968	1.45615	1.8757	1.06179	1.00118	1.6617	1.23441	1.18548	1.65331	1.38579	1.03664	1.71628	1.36057	1.64874	1.97791	1.95738	1.03953	1.23547
67	2.16852	1.27578	1.54473	1.54435	1.3662	2.21868	1.32137	1.45613	1.42751	2.7425	2.05372	1.3315	2.07073	2.49432	1.76953	1.56603	1.90713	1.09201	1.05868	1.67412	1.26172	1.13899	1.66892	1.38103	1.10897	1.72945	1.36758	1.70659	1.93775	2.04157	1.04962	1.04048
70	2.17276	1.24978	1.55414	1.45714	1.35263	2.22036	1.28241	1.46911	1.60275	2.805	1.93154	1.58102	2.12357	2.11572	1.79298	1.71274	1.94774	1.06387	1.08913	1.75687	1.22167	1.0925	1.76158	1.36439	0.99325	1.72155	1.48505	1.54208	1.94152	2.04508	1.04289	1.02176
73	2.17488	1.25845	1.55885	1.44225	1.36929	2.24388	1.3885	1.47849	1.49222	2.845	1.82553	1.31729	2.15144	2.25989	1.77665	1.62759	1.90844	1.05971	1.0181	1.68239	1.23259	1.05832	1.56169	1.39292	1.28255	1.72155	1.3518	1.41553	1.90386	2.01526	1.04289	0.995242
76	2.1876	1.24632	1.55414	1.3217	1.35942	2.22624	1.28974	1.49652	1.44773	2.81875	1.84751	1.33993	2.13983	2.32418	1.79215	1.65924	1.96084	1.04303	1.08913	1.71632	1.18161	1.11438	1.71785	1.40005	1.04147	1.73867	1.26414	1.58908	1.90261	2.05384	1.04794	0.995242
80	2.19184	1.26365	1.62158	1.38977	1.37854	2.28588	1.37114	1.48065	1.65802	2.72625	1.96322	1.47313	2.18164	2.38782	1.82481	1.53266	2.03026	1.04512	1.03501	1.68239	1.23441	1.07746	1.66788	1.37152	0.896818	1.70311	1.20102	1.48784	1.88253	2.08015	1.02271	0.968723

## Sheet: Figure 4-source data 7
	Il-37tg-Control																	IL-37tg-LPS
0	1	1	1	1	1	1	1	1	1	1	1	1	1	1				1	1	1	1	1	1	1	1	1	1	1	1	1	1
1	1.04936	0.987013	0.897138	0.939073	0.935355	1.02464	1.01187	1.02622	0.986602	0.959608	1.03967	1.02827	0.973308	1.04864				0.930052	0.995037	1.08468	1.00945	0.96233	1.20235	0.979559	1.12085	1.08076	1.1006	1.05689	1.28406	1.05478	0.991778
4	1.01049	1.05766	0.929178	0.944565	0.933469	1.0303	0.994859	0.972751	1.02738	0.952884	1.07459	0.945984	0.998383	1.04015				0.903657	1.01117	1.08338	0.960269	1.08051	1.13848	0.960337	1.07874	1.11478	0.98376	1.04678	1.15939	1.02878	1.03774
7	0.93665	1.01403	0.918901	0.936632	0.949506	0.997669	0.917933	0.973484	1.03638	1.0816	1.00825	0.95438	0.994424	1.0632				0.91142	1.00372	1.04548	0.991329	1.04147	1.03204	0.975862	1.04461	1.06074	1.01647	0.996207	1.03295	1.01021	0.917216
10	0.983288	0.989091	1.00233	1.03548	1.00139	0.98002	0.933466	1.04454	0.944236	1.00956	0.921828	0.957739	1.02016	0.941291				1.02476	1.00248	1.00366	1.02239	0.979213	1.03913	1.00691	0.994538	0.978685	0.986097	1.00126	0.967053	1.01393	0.996885
13	0.987175	1.03688	1.03376	1.05135	1.01083	1.04496	1.00595	0.984471	1.0475	0.975938	0.99079	1.04674	0.987166	1.00437				0.990606	1.02854	0.950078	0.999094	1.03092	1.00061	1.00691	0.953573	0.92865	1.07957	0.981037	0.911843	0.987929	1.04387
16	1.02993	1.04312	1.02893	1.06599	1.06554	0.944389	1.05551	0.955904	0.998252	0.990346	1.01349	0.959978	1.03072	0.941897				1.09153	0.975186	0.947465	1.00168	0.973937	0.782644	1.01578	0.941056	0.822576	0.969739	0.935525	0.872663	0.973073	0.976457
19	1.00855	0.947532	1.09059	0.96104	1.05941	0.951715	1.05773	0.980809	0.957475	1.02397	0.948016	0.993003	0.986506	1.00133				1.12802	0.983871	0.899111	1.02498	0.958109	0.85665	1.01652	0.922849	0.940658	1.08891	0.965866	0.876224	0.947075	0.958072
22	1.49825	2.61403	2.33897	2.56399	1.77024	1.34599	1.64059	1.54336	1.33083	2.06042	1.48662	1.48167	1.21746	1.959				2.55726	1.66253	1.51594	1.63841	1.80331	2.33678	1.89258	1.97428	1.91534	3.04241	2.34134	1.84328	1.63788	2.84357
25	1.53129	2.32312	2.31176	2.744	1.85467	1.51848	1.59399	1.5668	1.28528	2.47443	1.55209	1.52421	1.2168	1.86984				2.65507	1.78412	1.48327	1.92572	1.88773	2.31853	1.91846	1.79904	1.88332	2.80874	2.13906	1.95726	1.43733	2.8497
28	1.60513	2.24623	2.43811	2.7141	1.94524	1.51615	1.61471	1.7155	1.48387	2.34187	1.46218	1.65295	1.23396	1.86135				2.61082	1.62903	1.43753	2.04996	1.8012	2.18167	1.81126	1.69891	1.88532	2.72228	2.06321	1.80944	1.39276	2.75573
31	1.43995	2.20883	2.4768	2.72874	1.94335	1.55278	1.64947	1.56754	1.30488	2.37645	1.4421	1.56283	1.24188	1.80556				2.61859	1.5794	1.39963	1.88171	1.75689	2.11071	1.82161	1.63518	1.65716	2.56338	1.93173	1.6545	1.32962	2.48813
34	1.541	2.00312	2.45141	2.6781	1.9226	1.5035	1.55479	1.54556	1.31176	2.42448	1.46829	1.49846	1.22406	1.78736				2.60694	1.61042	1.39049	1.71865	1.76005	2.02048	1.82013	1.53619	1.80726	2.60778	1.89633	1.5138	1.20334	2.45953
37	1.3836	1.94701	2.46531	2.54874	1.9075	1.50117	1.50449	1.52798	1.25351	2.25349	1.39322	1.57515	1.24715	1.81223				2.58365	1.46526	1.40748	1.75747	1.56379	1.94951	1.77429	1.55894	1.64515	2.64984	1.77497	1.52093	1.13278	2.5392
40	1.46716	2.08	2.4097	2.63294	1.87118	1.44456	1.60213	1.57926	1.24557	2.26118	1.40195	1.53708	1.28345	1.96688				2.61393	1.45782	1.42054	1.85065	1.59861	1.91505	1.77651	1.49294	1.67717	2.43954	1.76991	1.42832	1.20334	2.53715
43	1.36805	1.88883	2.38854	2.43952	1.94995	1.47652	1.57032	1.50161	1.25986	2.4312	1.4002	1.57347	1.29665	1.91776				2.63799	1.50993	1.39049	1.76783	1.60916	1.83698	1.81791	1.43491	1.67317	2.62881	1.78002	1.40873	1.16249	2.35534
46	1.38749	1.74338	2.42723	2.4865	1.99807	1.45688	1.52446	1.4833	1.26251	2.44081	1.42901	1.47607	1.26761	2.05362				2.54716	1.3598	1.40617	1.66171	1.60494	1.71634	1.81274	1.39395	1.72121	2.51665	1.74463	1.39982	1.03993	2.36556
49	1.41858	1.93039	2.50038	2.42731	1.89571	1.34798	1.58882	1.44741	1.10576	2.32458	1.35568	1.56227	1.27289	2.00388				2.62945	1.19603	1.42839	1.74712	1.52369	1.62003	1.78612	1.34729	1.65516	2.36243	1.66877	1.28228	1.04735	2.51673
52	1.30781	1.82442	2.39216	2.35897	1.90231	1.39394	1.60657	1.47524	1.14865	2.27271	1.36004	1.56003	1.26167	1.92928				2.57356	1.35236	1.33821	1.69535	1.62921	1.60685	1.80017	1.30064	1.7192	2.51899	1.67889	1.25913	1.09564	2.38599
55	1.28449	1.84312	2.44174	2.3968	1.84807	1.37196	1.57772	1.4247	1.31229	2.16032	1.35743	1.52701	1.24517	1.84134				2.59064	1.19851	1.36827	1.6177	1.55323	1.62611	1.80978	1.2574	1.60112	2.51899	1.63338	1.17186	1.05478	2.34513
58	1.32724	1.98442	2.5034	2.46819	1.91128	1.39161	1.50523	1.47304	1.26516	2.26118	1.30418	1.53149	1.26365	2.03724				2.62014	1.20099	1.37219	1.65653	1.63026	1.63625	1.81126	1.23122	1.56309	2.40215	1.60303	1.13802	1.01021	2.40437
61	1.37971	2.04052	2.45987	2.45233	1.89996	1.43823	1.55183	1.49282	1.21061	2.16416	1.35568	1.46767	1.22802	1.91533				2.60849	1.27419	1.38787	1.64876	1.6176	1.5369	1.80313	1.20164	1.61513	2.54936	1.689	1.12556	1.01764	2.50038
64	1.3117	1.92831	2.48526	2.4688	1.80986	1.35365	1.44384	1.42983	1.28158	2.20835	1.37401	1.5382	1.28411	1.89107				2.57589	1.15261	1.36566	1.55558	1.59333	1.49027	1.7913	1.21871	1.5651	2.45823	1.68394	1.08994	1.07335	2.29202
67	1.26312	1.78909	2.44174	2.30772	1.8542	1.31036	1.54	1.47524	1.18519	2.24773	1.34608	1.4033	1.23264	1.89592				2.58831	1.16377	1.42316	1.62547	1.52369	1.4852	1.8083	1.16409	1.5691	2.37411	1.63843	1.07569	1.0065	2.30019
70	1.28644	1.92623	2.38189	2.24548	1.90703	1.3653	1.61766	1.37562	1.17619	2.06234	1.35655	1.53373	1.23132	1.91169				2.58365	1.21092	1.44407	1.58147	1.48148	1.5369	1.8327	1.15498	1.55109	2.33439	1.67889	1.03829	0.995357	2.50651
73	1.29032	2.00727	2.47196	2.3669	1.87826	1.15118	1.58512	1.4855	1.35783	2.07483	1.38798	1.43913	1.30918	1.87834				2.63877	1.09429	1.38395	1.45723	1.51841	1.49331	1.77873	1.14929	1.52907	2.36009	1.70923	0.96171	1.01764	2.4391
76	1.28449	1.83273	2.36133	2.14052	1.83392	1.13953	1.52668	1.40199	1.26145	2.15552	1.37663	1.56003	1.24452	1.91897				2.64964	1.08685	1.48327	1.58664	1.46038	1.37368	1.78612	1.13792	1.53908	2.526	1.85588	0.947462	1.02507	2.27568
80	1.35639	1.78909	2.60799	2.45599	1.89241	1.3653	1.59917	1.46206	1.36843	2.12958	1.41155	1.48839	1.22538	2.00934				2.46021	1.12407	1.40748	1.58923	1.51841	1.45783	1.79943	1.12199	1.49104	2.50497	1.92667	0.808549	0.965645	2.31245

## Sheet: Figure 4-source data 8
	WT																	IL-37tg
Control	123.036	70.2217	89.2003	79.4559	77.3765	126.996	73.916	83.1245	86.504	153.398	108.808	76.812	119.81	132.685	100.71	89.1983	108.749	77.8497	112.171	150.247	131.938	111.819	75.4468	91.6342	86.1605	76.0978	129.64	83.196	89.9979	74.3441	109.457
LPS	58.2412	60.2054	95.8885	69.9681	61.7557	93.4973	77.2799	55.8309	96.6698	69.2431	87.5362	106.458	116.342	58.0183	55.6377			152.172	67.271	84.7433	94.2376	90.8346	85.7148	106.417	66.3151	91.276	147.55	102.286	52.4456	59.1268	137.522
