# Supplementary material for: IL-37 expression reduces acute and chronic neuroinflammation and rescues cognitive impairment in an Alzheimer’s disease mouse model
Source: eLife. 2022 Aug 30;11:e75889. doi: 10.7554/eLife.75889 (PMC9481244; doi:10.7554/eLife.75889)
Supplement: Figure 5—figure supplement 1—source data 1. [file elife-75889-fig5-figsupp1-data1.xlsx]

## Sheet: Fig 5 fig sup 1-source data 1
	WT										rIL37
NaCl	10.893	7.24896	11.1303								11.3423	14.7395	9.75372
LPS	70.5066	47.4372	75.4077	69.2221							57.3757	48.9527	66.5996	39.1807

## Sheet: Fig 5 fig sup 1-source data 2
	WT										rIL37
NaCl	36.8561	15.6642	30.2848								38.7592	35.0677	46.206
LPS	58.864	44.6511	70.5128	64.6823							51.3362	39.0978	38.8015	80.3516

## Sheet: Fig 5 fig sup 1-source data 3
	WT										rIL37
NaCl	16.2545	7.25989	14.3983								17.4752	19.2291	18.2221
LPS	24.6334	33.3223	23.9845	21.5052							21.7429	17.5406	17.3476	21.6315
