# Supplementary material for: IL-37 expression reduces acute and chronic neuroinflammation and rescues cognitive impairment in an Alzheimer’s disease mouse model
Source: eLife. 2022 Aug 30;11:e75889. doi: 10.7554/eLife.75889 (PMC9481244; doi:10.7554/eLife.75889)
Supplement: Figure 5—source data 1. [file elife-75889-fig5-data1.xlsx]

## Sheet: Figure 5-source data 1
	WT					WT rIL-37
NaCl	100	61.1	68.8	53.8		50	77.8	73.3	66.7
IL-1b	0	35.3	0	0		60	57.1	61.5	41.2

## Sheet: Figure 5-source data 2
	WT								WT rIL-37
NaCl	6.01996	6.55757	7.04422	6.77067	7.55234	6.7112			10.6236	7.71004	6.341	7.11354	8.02244	6.36837
IL-1b	26.5805	23.9366	22.3779	25.8215					14.4054	17.9401	22.5678	17.7574

## Sheet: Figure 5-source data 3
	WT								WT rIL-37
NaCl	21.9683	24.0982	24.8455	27.7352	31.454	24.816			24.6421	25.5327	20.4975	20.922	24.6326	23.4923
IL-1b	90.2774	73.4597	73.5554	92.2046					34.9738	54.2095	72.2775	52.0874
