# Supplementary material for: IL-37 expression reduces acute and chronic neuroinflammation and rescues cognitive impairment in an Alzheimer’s disease mouse model
Source: eLife. 2022 Aug 30;11:e75889. doi: 10.7554/eLife.75889 (PMC9481244; doi:10.7554/eLife.75889)
Supplement: Figure 6—source data 1. [file elife-75889-fig6-data1.xlsx]

## Sheet: Figure 6-source data 1
WT	APP	APPIL37
40.19	63.73	42.87
43.76	59.01	41.52
29.96	35	37.98
30.27	37.08	38.59
41.97	42.28	23.03
37.96	40.15	24.96
	45.06	22.88
	45.85	20.67

## Sheet: Figure 6-source data 2
WT	APP	APPIL37
12.95	34.43	24.5
12.77	33.49	23.76
16.14	17.86	22.86
16.99	18.91	25.73
21.09	20.22	17.66
19.88	20.17	20.13
	23.07	12.67
	23.68	13.02
		12.19
		12.13

## Sheet: Figure 6-source data 3
WT	APP/PS1	APP/PS1-IL37
7.37	10.8	10.6
3.64	13	6.94
4.71	11.2	11.1
2.21	10.9	7.69
	14.5	5.41
		11.6

## Sheet: Figure 6-source data 4
WT	APP	APPIL37
29.6	38.6	38
30.5	47	43.9
23.7	45	37.4
	39.9	31.9
	50.7	33.7
	46.3

## Sheet: Figure 6-source data 5
WT	APP/PS1	APP/PS1-IL37tg -/-
4.95	37.7	31.2
14.9	53.4	28.4
25.1	31.4	30.5
17.8		29.2
9.94		23.2
		21.6
		22.7

## Sheet: Figure 6-source data 6
HP		CX
APP/PS1	APP/PS1-IL37	APP/PS1	APP/PS1-IL37
0.00459779	0.00392302	0.00954199	0.00761856
0.00671674	0.00495541	0.00889081	0.00936612
0.00616403	0.00687215	0.008038	0.00813935
0.0064049	0.00636225	0.00612355	0.00303875
0.00554437	0.00482417	0.0071364	0.0084351
0.00666473	0.0076349	0.00453066	0.00631205
0.00472897	0.00607048	0.00672371	0.00587401
0.00568032	0.00679884	0.0093976	0.00867486
0.00512044	0.00619957	0.009803	0.00498202
0.00646447	0.00606457	0.0109038	0.00538313
0.0102289	0.0037833	0.0112625	0.006212
0.00824993	0.00651653	0.0125478	0.00572008
0.00651722	0.00409023	0.00711866	0.00644432
0.00402264	0.00523173	0.00548409	0.00600549
0.00422229	0.00534612	0.00652035	0.00396571
0.00443142	0.00427557	0.0074556	0.00613783
0.00316055	0.00359944	0.00742869	0.00481873
0.00399794	0.00366626	0.0040438	0.00767891
0.00289648	0.00408514	0.00241066	0.00475527
0.00684639	0.00466297	0.00696118	0.00715187
0.00403129	0.00500555	0.00714878	0.0043944
0.00243945	0.00442389	0.00766809	0.00654225
0.00480082	0.00597914	0.0133218	0.00327556
0.00311889	0.00552099	0.0096648	0.00489581
0.00331133	0.00442949	0.00550385	0.0050125
0.0049356	0.00370685	0.00853687	0.00576538
0.00476194	0.00433857	0.00606834	0.00266243
0.00462157	0.00304911		0.000563999
0.00354612	0.00400288		0.00279118
0.00401527	0.00427113		0.00173829
0.00545617	0.00392238		0.00218798
0.00484695	0.00306166		0.00246543
0.00575332	0.00155517		0.00259398
0.00536695	0.00125838		0.0018
	0.0011343		0.00268095
	0.0020989		0.00213838
	0.00248423		0.00318577
	0.0026603		0.00286
	0.00300176
	0.00173663
	0.00129844
	0.00259213

## Sheet: Figure 6-source data 7
HP		CX
APP/PS1	APP/PS1-IL37	APP/PS1	APP/PS1-IL37
5121.57	4592.78	8703.37	6704.73
7100.17	6758.33	9967.27	12513.4
7734.99	6368.16	11182.5	7578.72
7466.49	4519.63	10324	2763.23
7970.87	5923.24	10987.3	8562.24
7731.94	7900.12	6828.48	4993.9
6156.71	6373.07	9310.72	4013.13
6618.43	7139.02	14135.2	8905.57
6457.73	5522.49	12408.7	4973.18
6707.23	8907.69	9325.99	7364.64
6266.43	4135.2	11307.5	6498.98
8910.93	5643.56	9787.09	7155.86
4842.82	6527.63	7877.33	7744.4
4498.7	5285.96	6757.66	4923.47
4479.98	6088.07	4514.73	3836.31
7735.5	5047.82	11523.2	6976.19
3704.49	3279.52	8670.97	5616.93
3674.9	4817.99	6614.92	9675.38
3120.37	4444.52	4023.24	5234.45
8482.71	4586.59	6292.81	5477.49
4860.23	7015.21	5744.17	3976.38
2892.27	4199.71	10781.9	5760.39
4242.45	7118.88	17961.2	3272.07
7175.63	6820.27	11265.5	4064.7
2877.39	4940.4	7205.57	7451.82
4966.44	6137.81	11036.6	6295.6
4194.33	5951.73	6056.6	3179.05
4003.09	4072.29		518.518
3007.93	4181.8		2728.73
2905.42	4760.41		2875.83
7271.43	3536.74		4346.38
5314.71	1912.31		2544.68
5791.65	920.514		5341.52
6198.4	891.716		2029.88
	1496.01		1460.93
	1055		1999.95
	1944.98		3032.87
	1892.37		2492.47
	3332.67
	2473.58
	1654.55
	1556.97

## Sheet: Figure 6-source data 8
WT	APP/PS1	APP/PS1-IL37
2.21	18.5	39
2.67	22.1	34.6
0.77	28.9	38.5
3.95	33.4	26.2
5.99	33.7	37.2
6.33		42.7
2.95		36
6.66		34.7
3.91		44.3
6.05
6.59
