# Supplementary material for: IL-37 expression reduces acute and chronic neuroinflammation and rescues cognitive impairment in an Alzheimer’s disease mouse model
Source: eLife. 2022 Aug 30;11:e75889. doi: 10.7554/eLife.75889 (PMC9481244; doi:10.7554/eLife.75889)
Supplement: Figure 7—figure supplement 1—source data 1. [file elife-75889-fig7-figsupp1-data1.xlsx]

## Sheet: Fig 7 fig sup 1-source data 1
WT	APP/PS1	APP/PS1-IL37tg -/-
13	12	10
13	13	10
12	13	8
10	12	10
10	12	12
10	12	12
12	12	12
12	9	12
12	9	9
9	9	9
9		9
9
