# Supplementary material for: IL-37 expression reduces acute and chronic neuroinflammation and rescues cognitive impairment in an Alzheimer’s disease mouse model
Source: eLife. 2022 Aug 30;11:e75889. doi: 10.7554/eLife.75889 (PMC9481244; doi:10.7554/eLife.75889)
Supplement: Figure 7—source data 1. [file elife-75889-fig7-data1.xlsx]

## Sheet: Figure 7-source data 1
day	WT															APP/PS1															APP/PS1-IL37
1	45.36	22.78	45.98	52.36	25.74	23.95	22.2	33.475	17.5	22.325	43.55	27.9				33.57	53.88	59.84	57.54	25.975	37.25	48.275	30.45	35.525	44.95						59.89	59.27	26.5	50.85	54.88	44.3	48.175	33.725	47.325	30.25	29.325
2	51.94	23.21	18.98	27.63	28.97	17.94	45.05	35.825	23.85	34.075	20.925	37.075				54.05	42.81	37.46	47.66	32.875	17.625	48.55	41.9	32.9	12.675						37.19	32.37	36.64	59.89	36.55	35.225	19.55	44.55	22.275	26.4	23.475
3	11.97	20.99	7.97	26.48	60	23.65	31.85	27.375	42.8	19.1	33.425	43.05				46.95	41.79	40.41	27.79	36.175	56.85	60	43.3	46.4	45.4						57.16	26.91	37.43	36.27	37.38	29.8	25.3	33	42.525	35.175	16.675
4	11.89	19.68	9.59	6.73	44.44	5.97	9.8	17.95	43.5	25.825	29.6	13.125				54.25	15.39	43.34	40.75	18.7	47.675	42.125	48.475	46.025	45.55						59.99	41.99	16.08	40.73	38.55	30.5	20.8	39.175	47.325	21.45	9.425
5	19.01	14.68	5.97	7.48	25.34	12.83	17.25	6.575	22.85	11.225	11.525	7.7				51.8	27.39	25.91	22.13	16.075	57.75	46.4	27.725	21.7	52.15						48.19	21.55	7.68	17.47	44.05	22.95	36.525	42.525	31.9	12.9	9.15
6	20.16	14.01	3.54	10.77	4.21	10.39	32.675	22.625	14.1	7.975	22.475	20.15				31.85	44.21	32.82	23.87	9.225	60	32.85	30.275	17.675	37.25						33.94	25.18	40.18	40.46	30.67	16.95	19.4	20.28	15.275	9.95	6.35
7	20.99	22.93	9.52	32.73	8.95	10.97	27.45	14.3	18.15	11.1	13.75	10.775				32.5	23.85	24.91	38.89	8.875	55.225	28.0167	22	8.05	15.375						33.39	42.48	20.51	25.75	24.87	15.5	16.6143	22.71	18.075	7.05	16.7
8	6.56	7.74	2.29	34.68	16.19	6.34	38.1	8.2	10.75	5.375	26.475	21.7				7.31	39.77	20.02	26.57	5.825	38.35	25.45	21.1	12.475	36.175						9.75	34.32	41.86	30.57	37.52	8.275	17.8143	24.3	12.7	11	6.2

## Sheet: Figure 7-source data 2
WT NT	WT TQ	APP/PS1 NT	APP/PS1 TQ	APP/PS1-IL37 NT	APP/PS1-IL37 TQ
16.6867	49.94	23.91	28.26	24.05	27.85
16.56	50.32	27.7867	16.64	22.46	32.62
10.17	69.5	25.31	24.06	27.94	16.18
18.8067	43.58	24.24	27.28	14.4133	56.76
10.46	68.62			25.29	24.13
12.4833	62.54
18	43	29	12	13	52
12	57	16	46	17	48
11	61	33	2	23	31
14	52	15	53	19	39
23	33	23	30	21	32
10	67	16	49	7	74

## Sheet: Figure 7-source data 3
	WT (N=4, n=18)																		APP (N=4, n=18)																		APPIL37 (N=3, n=12)
0	1	1	1	1	1	1	1	1	1	1	1	1	1	1	1	1	1	1	1	1	1	1	1	1	1	1	1	1	1	1	1	1	1	1	1	1	1	1	1	1	1	1	1	1	1	1	1	1
1	1.10289	1.11851	0.989836	1.01569	1.20428	1.08139	1.09762	0.98707	1.05591	1.09002	1.09301	1.08027	1.11769	1.11517	1.12576	1.0822	1.0699	1.1297	1.10655	1.10442	1.0182	1.03096	1.2073	1.0151	1.10819	1.00605	1.10821	1.00475	1.13683	1.02734	1.01855	0.909225	1.07541	1.19527	1.14488	1.04567	0.945551	1.00222	1.11282	1.08341	1.24786	0.928674	1.16817	1.20126	1.16318	1.24336	1.25483	1.09222
4	1.06359	1.06525	1.01111	1.03207	1.09673	1.00991	1.08219	0.934863	1.02548	1.02441	1.08772	1.03117	0.998258	1.04428	1.09026	1.03649	1.00382	1.06015	1.00024	1.04421	1.01553	0.988947	1.10903	1.01584	1.05157	1.04174	1.08733	1.03045	1.03417	0.959704	0.996107	0.941697	1.04864	1.10008	1.10631	1.04567	0.956691	0.985314	1.05966	1.05657	1.06924	0.972757	1.09197	1.13602	1.03573	1.10858	1.09583	1.051
7	1.0374	1.00311	1.00284	1.08752	0.984181	0.883284	1.01279	0.936077	1.02853	1.02178	1.03269	0.998079	0.980343	0.997725	1.03702	1.01585	1.00267	1.02068	1.1452	0.996043	0.979716	0.964843	1.08096	1.00774	1.01921	1.0424	1.02123	0.992289	1.0011	1.00669	1.00523	0.97417	1.00402	1.10552	1.04151	1.01278	1.011	1.06364	1.01122	1.11166	1.08148	0.998031	1.04411	1.08839	0.995402	1.07062	1.05286	1.00979
10	1.00858	1.00311	0.991609	1.02073	0.954167	0.985398	0.980657	0.936077	0.995055	0.979792	1.03798	0.978864	1.03807	0.995609	1.02434	1.00848	0.938913	0.962406	0.889104	0.989162	0.974371	1.02545	0.992045	0.977532	1.01517	0.99415	1.02992	0.979827	0.988012	0.98391	0.998211	1.00959	1.00253	1.02257	1.01219	0.993801	1.04999	1.01202	0.954519	1.02691	0.966479	1.0233	0.962877	0.973438	1.01315	0.992787	0.96691	1.00979
13	0.965355	0.96464	1.01288	0.977884	0.987932	1.02726	0.961378	1.00771	0.981362	0.969294	0.955454	0.972459	1.04106	0.993493	0.925456	0.976041	1.00267	0.945489	1.03407	0.891106	1.04866	0.975862	0.94993	1.00184	0.942366	0.963083	0.942937	0.968144	0.909467	1.01879	1.00663	1.0155	0.986167	0.909709	0.942756	0.941928	1.02632	1.00134	0.962788	1.01985	0.971373	1.01919	0.915016	0.887485	1.05025	0.850418	0.919639	0.994333
16	0.957496	0.949845	0.996927	0.987965	0.940411	1.04667	0.94981	1.0927	0.963104	0.994664	0.93006	0.977797	0.970391	0.94694	0.958418	0.953926	0.953982	0.949248	0.879439	1.02357	1.0027	0.997211	0.912494	0.996685	0.960566	0.945897	0.944676	0.951009	0.992146	1.00313	1.00523	1.05683	0.971293	0.928746	0.92424	0.950152	1.01657	0.971963	0.966332	0.906844	0.91999	1.03565	0.93013	0.89577	0.934097	0.899772	0.906747	0.906749
19	0.912961	0.908418	0.987472	0.979144	0.894141	1.063	0.939528	1.12184	1.00114	0.943924	0.922654	0.999146	0.983329	0.970216	0.874746	0.965721	1.00267	0.93985	0.893936	0.994323	0.967957	1.04748	0.837623	0.987845	0.962588	1.06157	0.9238	0.953345	0.932203	1.00954	0.991898	1.05092	0.946006	0.889312	0.876408	0.99127	0.981757	0.985314	0.978145	0.885656	0.932224	1.06033	0.934538	0.906125	0.92603	0.971906	0.86807	0.963421
22	2.30663	3.4443	1.55005	2.42329	2.07466	2.45277	2.38802	2.64311	1.88056	2.11355	1.65379	2.55551	1.86216	2.3044	2.21856	1.73977	2.93381	2.98308	1.45446	3.27198	1.70181	1.47033	2.17127	1.12265	1.7088	1.3068	1.31872	1.40198	1.88025	2.0205	1.66813	1.44059	1.53205	2.33886	2.09227	1.94522	2.15012	1.52114	2.13467	2.55103	2.48104	1.87204	1.90119	1.81018	2.57643	2.51708	1.98109	2.17929
25	2.25555	3.19574	1.5536	2.40061	2.01963	2.4926	2.19652	2.6334	1.89882	2.06719	1.58608	2.5886	1.88803	2.38269	2.16531	1.72355	2.88513	2.84962	1.5366	2.98469	1.67027	1.37736	1.73608	1.17274	1.70475	1.29557	1.39005	1.39185	1.96293	2.00555	1.84631	1.49668	1.5618	2.26951	1.89786	1.95597	2.27684	1.52737	2.00827	2.38011	2.13115	2.02956	1.88545	2.01212	2.31508	2.38231	1.90374	2.10201
28	2.05383	2.84658	1.55419	2.41573	1.91959	2.34249	2.02943	2.62611	1.86535	1.98058	1.59666	2.56512	1.83429	2.33825	2.16024	1.70586	2.8689	2.75188	1.51727	2.67848	1.66172	1.3691	1.5255	1.24567	1.69666	1.31474	1.36395	1.34902	1.88232	1.94646	1.82596	1.48192	1.53503	2.16481	1.67721	1.87816	2.21139	1.53538	1.85115	2.14563	1.94764	2.01722	1.78658	1.96344	2.10373	2.14503	1.75763	1.96806
31	1.89141	2.68383	1.52642	2.29853	1.84956	2.16379	1.87906	2.57634	1.7771	1.87998	1.50672	2.54056	1.79746	2.25044	2.09432	1.62919	2.82138	2.62594	1.78787	2.42732	1.69005	1.32709	1.22602	1.13518	1.58342	1.30945	1.24913	1.30929	1.85545	1.91656	1.77265	1.46421	1.47702	1.98667	1.526	1.88133	2.1543	1.46061	1.73538	2.09196	1.75924	2.11479	1.68834	1.91684	1.92143	1.96659	1.633	2.14323
34	1.75388	2.62761	1.48859	2.25317	1.77202	2.08312	1.75439	2.58362	1.70407	1.8616	1.50883	2.51388	1.7895	2.22822	1.9498	1.61887	2.71473	2.57331	1.84586	2.29142	1.62164	1.30161	1.32429	1.20884	1.53286	1.32664	1.23521	1.25399	1.81342	1.81048	1.77546	1.44649	1.45619	1.83709	1.46737	1.7934	2.26013	1.38852	1.61488	1.88573	1.66136	2.10245	1.59451	1.85264	1.86819	1.70463	1.37946	2.11231
37	1.62683	2.56251	1.47264	2.17756	1.73826	2.01879	1.66313	2.54841	1.70863	1.81436	1.42948	2.44876	1.74073	2.19753	1.84838	1.57317	2.79819	2.48308	1.98599	2.28453	1.62645	1.2961	1.25409	1.12044	1.42366	1.34911	1.24391	1.14261	1.75899	1.83041	1.73687	1.40812	1.42347	1.75143	1.30844	1.69851	2.15987	1.3636	1.51565	1.80239	1.5953	1.94316	1.59388	1.82986	1.89239	1.72361	1.40095	1.93715
40	1.56788	2.45894	1.45077	2.1763	1.66448	1.88706	1.56545	2.56055	1.66908	1.78025	1.44112	2.3655	1.69694	2.13511	1.91176	1.58938	2.63823	2.43233	2.00048	2.06778	1.6056	1.28508	1.13711	1.11013	1.40748	1.34118	1.23173	1.19168	1.70732	1.77844	1.72495	1.44354	1.41603	1.6576	1.26369	1.69534	2.08467	1.31909	1.53101	1.63995	1.55126	1.94081	1.61592	1.77186	1.87142	1.69134	1.37946	2.01958
43	1.45393	2.49149	1.44368	2.20024	1.66073	1.82273	1.44207	2.55084	1.58539	1.72776	1.40303	2.25982	1.66011	2.11607	1.80527	1.56579	2.50956	2.41729	2.01015	2.08154	1.58048	1.29128	1.09031	1.15359	1.40142	1.29226	1.14127	1.15118	1.68734	1.77417	1.71863	1.4583	1.38629	1.60865	1.18192	1.68522	2.1153	1.28082	1.46722	1.59051	1.48275	1.91848	1.59577	1.70662	1.92627	1.57745	1.3107	1.97321
46	1.31508	2.50925	1.44664	2.12211	1.68074	1.7921	1.34182	2.5387	1.64473	1.74351	1.29933	2.20538	1.62926	2.11818	1.60243	1.55842	2.57564	2.41729	2.05364	1.9594	1.60453	1.29403	1.09499	1.20295	1.41557	1.38084	1.02123	1.14261	1.6205	1.74498	1.69338	1.43173	1.38034	1.49442	1.11403	1.59603	2.06796	1.2826	1.47903	1.48881	1.43626	1.77506	1.66945	1.68591	1.79076	1.49203	1.27202	1.98867
49	1.25876	2.45894	1.46023	2.10069	1.61446	1.79618	1.24542	2.54113	1.59757	1.68402	1.30357	2.11678	1.59244	2.08115	1.69878	1.56432	2.48522	2.3703	2.10196	1.79598	1.59919	1.32365	1.18858	1.1639	1.34277	1.31474	1.0595	1.04837	1.6398	1.75495	1.72425	1.41993	1.36546	1.41964	1.04614	1.55554	2.01504	1.19982	1.39752	1.35885	1.45584	1.66574	1.60332	1.58132	1.75365	1.35346	1.22475	1.96806
52	1.26007	2.4619	1.41591	2.10069	1.56568	1.74104	1.56545	2.52656	1.59757	1.57817	1.31097	2.07622	1.59144	2.06317	1.63286	1.61003	2.43654	2.38534	2.03914	1.78909	1.56658	1.29954	1.11839	1.18085	1.3185	1.41984	0.995129	1.07329	1.63222	1.7165	1.72495	1.39631	1.34761	1.29589	1.02145	1.5878	2.03871	1.15621	1.37389	1.37863	1.42158	1.63752	1.59199	1.59271	1.66331	1.18641	1.19037	1.99382
55	1.24304	2.42048	1.42064	2.08052	1.6007	1.72879	1.44207	2.60062	1.56714	1.60616	1.36705	2.06127	1.5785	2.06528	1.59483	1.54958	2.44581	2.3515	2.07296	1.7048	1.59064	1.3023	1.17922	1.2	1.22548	1.31011	1.01079	1.02266	1.55092	1.66667	1.70952	1.39041	1.34761	1.20887	0.99676	1.54352	1.96073	1.11437	1.38925	1.25574	1.38977	1.47236	1.58632	1.55336	1.53747	1.05543	1.12591	1.95775
58	1.23911	2.19855	1.41945	2.07422	1.50191	1.73389	1.34182	2.53263	1.56409	1.6359	1.36599	2.04099	1.57253	2.0748	1.59229	1.52451	2.33337	2.34962	2.01981	1.64459	1.54841	1.30436	1.0482	1.2	1.25177	1.32862	0.92032	1.03902	1.47995	1.59618	1.71443	1.39926	1.32976	1.20207	0.944299	1.5353	1.9858	1.03783	1.28884	1.17946	1.37999	1.35481	1.58884	1.44255	1.42292	1.40661	1.06575	1.91654
61	1.23125	2.31987	1.45491	2.02886	1.50566	1.65731	1.24542	2.52292	1.61735	1.62803	1.33002	2.02711	1.59542	2.07904	1.59483	1.49355	2.18036	2.29887	1.96183	1.50525	1.56551	1.31332	1.14179	1.21768	1.22144	1.31341	0.906402	1.00553	1.50406	1.63321	1.7032	1.44059	1.33869	1.12728	0.93967	1.5081	1.97326	1.03694	1.22741	1.07211	1.31147	1.30308	1.59514	1.38663	1.47455	1.32688	1.37516	1.93715
64	1.20506	2.29916	1.41886	1.99105	1.23804	1.56438	1.56545	2.56298	1.56714	1.59391	1.28558	1.92037	1.58547	2.07163	1.49848	1.52451	2.1085	2.28195	2.07296	1.47256	1.542	1.31951	1.12775	1.18969	1.16077	1.35836	0.906402	1.02734	1.48753	1.60829	1.66041	1.44649	1.35356	1.10008	0.884123	1.46445	1.99554	1.02893	1.18842	1.07776	1.26254	1.20904	1.64363	1.31932	1.43422	1.26424	1.3064	1.71046
67	1.23911	2.20151	1.39877	1.94065	1.32683	1.58174	1.44207	2.5217	1.63712	1.59041	1.34272	1.94385	1.58945	2.08009	1.59229	1.55547	2.11313	2.31391	1.91834	1.39687	1.54253	1.32365	1.03416	1.2081	1.18099	1.30218	0.902923	1.04214	1.43379	1.55845	1.66462	1.5262	1.33571	1.1164	0.879494	1.42966	1.93706	0.969292	1.22977	1.11025	1.28701	1.64698	1.5964	1.28722	1.39872	1.20919	1.25913	1.74652
70	1.26269	2.2163	1.42123	1.85874	1.36935	1.56336	1.34182	2.53749	1.58692	1.55717	1.37869	1.97801	1.58149	2.06105	1.46805	1.48765	2.04474	2.31391	2.01015	1.25925	1.4955	1.36566	1.14647	1.17348	1.1365	1.33126	0.807237	1.12626	1.47237	1.59049	1.64989	1.50554	1.31489	1.11232	0.868693	1.39423	1.9287	1.12061	1.16243	1.01137	1.25275	1.48182	1.57688	1.29239	1.37291	1.11427	1.22905	1.58681
73	1.25352	2.0358	1.39345	1.89528	1.39936	1.54192	1.24542	2.55691	1.59757	1.52218	1.29087	1.96627	1.54367	2.04729	1.55933	1.52304	2.07952	2.27444	1.85552	1.31774	1.48855	1.35808	1.10435	1.17569	0.966633	1.35506	0.782881	1.07096	1.49993	1.54208	1.62814	1.52029	1.40711	1.00625	0.823947	1.47141	1.88135	1.03694	1.12817	1.02126	1.2552	1.35481	1.62033	1.22198	1.31161	1.11427	1.17318	1.64348
76	1.2247	1.95591	1.43423	1.80959	1.38436	1.5797	1.56545	2.53384	1.67364	1.52393	1.28981	1.93638	1.52874	2.04835	1.58722	1.52156	1.90912	2.2594	1.94733	1.31946	1.52543	1.35601	1.01076	1.21989	1.1183	1.3577	0.800278	1.01955	1.48822	1.51004	1.62814	1.54686	1.32828	1.03073	0.816232	1.4771	1.82565	0.971073	1.1199	1.08482	1.23318	1.30308	1.55547	1.16813	1.2616	1.07062	1.11732	1.62803
80	1.20113	2.06539	1.35445	1.8852	1.36435	1.51026	1.39837	2.56055	1.59909	1.47669	1.30462	1.91076	1.48992	2.07163	1.54412	1.52009	1.93578	2.2782	1.99565	1.27129	1.49924	1.34362	0.889097	1.22726	1.08594	1.45619	0.833333	1.02698	1.43517	1.52214	1.61622	1.58229	1.33423	1.02937	0.79463	1.43661	1.89528	0.93992	1.05257	1.01985	1.35796	1.1206	1.54728	1.16709	1.25837	1.06112	1.06575	1.68985

## Sheet: Figure 7-source data 4
WT	APP	APPIL37
2.25738	1.5424	2.21362
3.2348	3.06795	1.54909
1.53138	1.68909	2.0541
2.40615	1.43755	2.43294
2.04164	1.92232	2.34695
2.47442	1.15506	1.88615
2.3181	1.65258	1.88759
2.61155	1.30786	1.8427
1.90065	1.35873	2.49125
2.07244	1.43796	2.49772
1.61824	1.89996	1.92523
2.56319	2.01039	2.14941
1.85479	1.78345
2.32323	1.46539
2.20335	1.51778
1.72237	2.32989
2.9199	2.03055
2.86015	1.91549

## Sheet: Figure 7-source data 5
WT	APP	APPIL37
1.21606	1.95313	1.84905
2.04172	1.28677	0.953805
1.40953	1.50768	1.07903
1.80102	1.34885	1.05968
1.38335	0.954609	1.26156
1.54294	1.24921	1.21875
1.48834	1.08109	1.55433
2.5387	1.39036	1.16875
1.61522	0.799235	1.25708
1.49838	1.01387	1.06834
1.29002	1.41877	1.08036
1.89752	1.52186	1.65997
1.48992	1.61959
2.05787	1.57815
1.54107	1.35386
1.50505	1.03399
1.94135	0.795248
2.2812	1.41662

## Sheet: Figure 7-source data 6
WT	APP/PS1	APP/PS1-IL37
1.62434	1.30311	1.5538
1.57679	1.72511	1.23149
1.52767	1.44471	1.07302
1.47192	1.23192	1.23624
1.38845	1.65724	1.76107
1.42462	1.68634	1.13488
1.7943	1.27975	1.19069
1.39903	0.878018	1.31844
1.41905	1.10334	1.89256
1.28181	1.01384	1.26285
1.63305	1.30769	1.78819
1.6358	1.315	1.1243
1.58334	0.871578	1.17532
1.85625	0.947576	1.13786
1.92089	0.943118	1.6533
1.54292	1.22607	1.33905
1.58949	1.35135	1.1585
1.47639	1.35552	1.53766
1.65184	1.18238	1.31889
0.986323	1.52524	1.23743
1.19187	1.31203	1.4648
1.41863		1.3821
		1.13568
