# Supplementary material for: IL-37 expression reduces acute and chronic neuroinflammation and rescues cognitive impairment in an Alzheimer’s disease mouse model
Source: eLife. 2022 Aug 30;11:e75889. doi: 10.7554/eLife.75889 (PMC9481244; doi:10.7554/eLife.75889)
Supplement: Figure 8—figure supplement 1—source data 1. [file elife-75889-fig8-figsupp1-data1.xlsx]

## Sheet: Fig 8 fig sup 1-source data 1
	WT			IL37
Ctrl	6.46812	6.53621		6.43519	6.35954	6.45816
LPS	11.8734	11.9173		11.6002	11.3857

## Sheet: Fig 8 fig sup 1-source data 2
	WT			IL37
Ctrl	-5.05024	-4.52324		-5.05024	-5.05024	-5.05024
LPS	-1.68782	-1.62967		-0.597375	-2.20009

## Sheet: Fig 8 fig sup 1-source data 3
	WT			IL37
Ctrl	3.98786	2.5539		2.92542	3.52057	3.16436
LPS	10.105	10.8094		10.2927	9.21474

## Sheet: Fig 8 fig sup 1-source data 4
	WT			IL37
Ctrl	4.24591	3.23654		3.89124	4.03648	3.77212
LPS	7.65987	6.73686		7.74214	6.6741
