# Supplementary material for: IL-37 expression reduces acute and chronic neuroinflammation and rescues cognitive impairment in an Alzheimer’s disease mouse model
Source: eLife. 2022 Aug 30;11:e75889. doi: 10.7554/eLife.75889 (PMC9481244; doi:10.7554/eLife.75889)
Supplement: Figure 8—source data 1. [file elife-75889-fig8-data1.xlsx]

## Sheet: Figure 8-source data 1
	WT			IL37
Ctrl	-5.05024	-5.05024		-5.05024	-5.05024	-4.50385
LPS	1.73033	2.10577		0.454783	0.119925

## Sheet: Figure 8-source data 2
	WT			IL37
Ctrl	-1.80795	-2.04037		-1.78262	-1.51101	-1.51544
LPS	4.51582	6.06317		4.66671	3.21989

## Sheet: Figure 8-source data 3
	WT			IL37
Ctrl	0.521016	0.215764		-0.0864442	0.761519	0.533638
LPS	1.78609	3.40763		2.26316	1.70079

## Sheet: Figure 8-source data 4
	WT			IL37
Ctrl	-3.52384	-4.13808		-3.6034	-3.6526	-3.7985
LPS	-0.0525543	2.77715		0.554968	-0.674405

## Sheet: Figure 8-source data 5
	WT			IL37
Ctrl	7.33864	7.58559		7.44791	7.44521	7.36672
LPS	10.3239	10.4099		9.87652	9.58835

## Sheet: Figure 8-source data 6
	WT			IL37
Ctrl	6.81175	6.90285		6.81499	6.87923	6.82908
LPS	5.1347	5.15178		5.55469	5.53966

## Sheet: Figure 8-source data 7
	WT			IL37
Ctrl	3.55644	3.60643		3.42259	3.12323	3.27412
LPS	-3.01642	-2.07709		-0.78064	-1.1323

## Sheet: Figure 8-source data 8
	WT			IL37
Ctrl	9.28171	9.3315		9.42226	9.40219	9.5368
LPS	7.46695	7.26373		7.92795	7.96968
